# Supplementary material for: High performance magnetic separation of gold nanoparticles for catalyticoxidation of alcohols
Source: Royal Society of Chemistry journal article supplement (doi:10.1039/b916825g), 2009-10-29
Supplement: b916825g.pdf [file b916825g.pdf]

Electronic Supplementary Information

## High performance magnetic separation of gold nanoparticles for catalytic oxidation of alcohols

Rafael L. Oliveira,<sup>a</sup> Pedro K. Kiyohara<sup>b</sup> and Liane M. Rossi,<sup>\*a</sup>

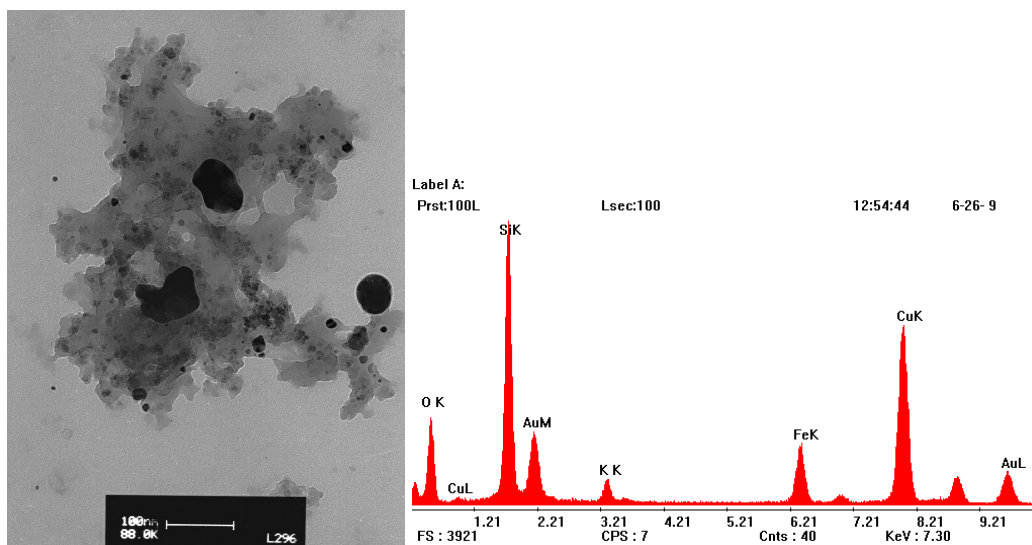

Fig S1. TEM image and EDS analysis of the spent catalyst (catalyst 3 after 2 successive oxidation reactions).

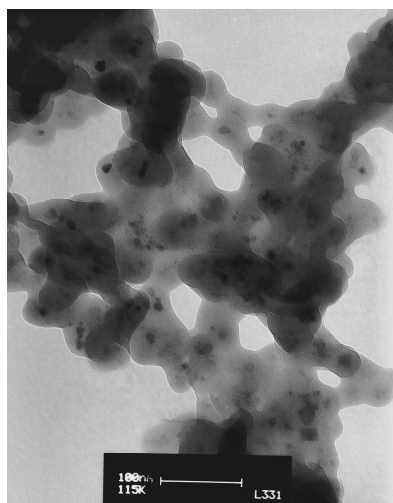

Fig. S2. TEM image of the catalyst support after treatment with base.
